# Supplementary material for: Graphene induced porphyrin nano-aggregates for efficient electron transfer and photocurrent generation
Source: Royal Society of Chemistry journal article supplement (doi:10.1039/c6tc01580h), 2016-01-01
Supplement: c6tc01580h1.pdf [file c6tc01580h1.pdf]

## Graphene Induced Porphyrin Nano-Aggregates for Efficient Electron Transfer and Photocurrent Generation

Bodhisatwa Mondal<sup>1</sup>, Rajesh Bera<sup>1</sup>, Sandip K. Nayak<sup>2</sup> and Amitava Patra<sup>1\*</sup>

<sup>1</sup>Department of Materials Science, Indian Association for the Cultivation of Science, Kolkata 700 032, India

<sup>2</sup>Bio-organic Division, Bhabha Atomic Research Centre, Mumbai-400 085, India

\*To whom correspondence should be addressed. E-mail: [msap@iacs.res.in](mailto:msap@iacs.res.in)  
Phone: (91)-33-2473-4971, Fax: (91)-33-2473-2805

### Supporting Information

#### Synthesis of GO:

GO was synthesized by using the graphite powder, in order to maintain modified Hummer's method. Briefly, graphite powder (1 g) and NaNO<sub>3</sub> (1 g) was taken in a 500 mL round-bottom flask. Then 50 mL of concentrated H<sub>2</sub>SO<sub>4</sub> was slowly added to the mixture maintaining the 0°C temperature and then solid KMnO<sub>4</sub> (3 g) was added to the mixture and was stirred continuously for 1 h at room temperature. The water (200 mL) and H<sub>2</sub>O<sub>2</sub> (30%) solution was added to the reaction mixture under stirring condition until the gas evolution was ceased. The mixture was then washed with 5% HCl solution and water. The residue was then separated from the reaction mixture by vacuum filtration and then washed repeatedly with 5% HCl solution. Finally, it was washed with copious amount of Millipore water and dried in a vacuum to get the yellow brown solid of GO. The product was dispersed in water by sonication for 45 min, and then large particles were centrifuged out at 5000 rpm. The remaining particles were centrifuged at 12000 rpm and collected and dried at vacuum.

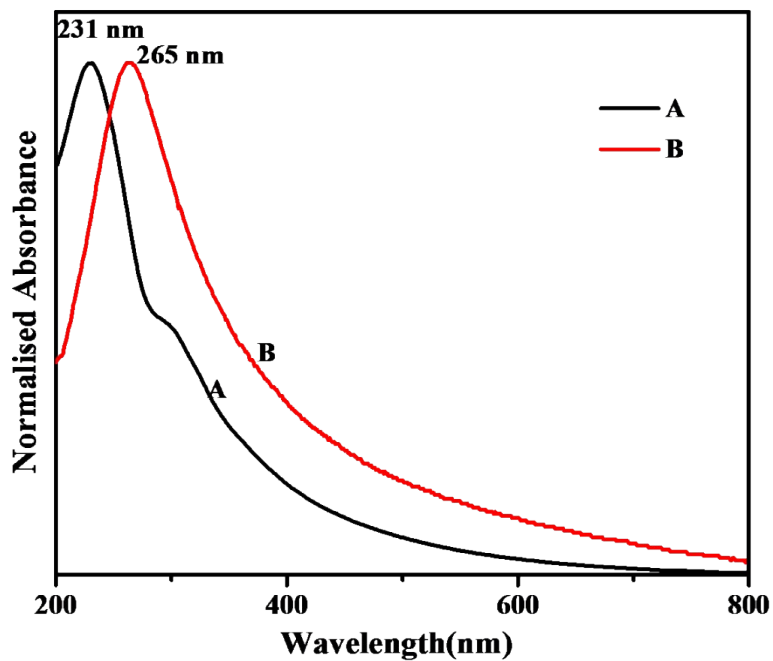

Fig. S1. UV-Vis spectrum of GO (A) and RGO (B) in water

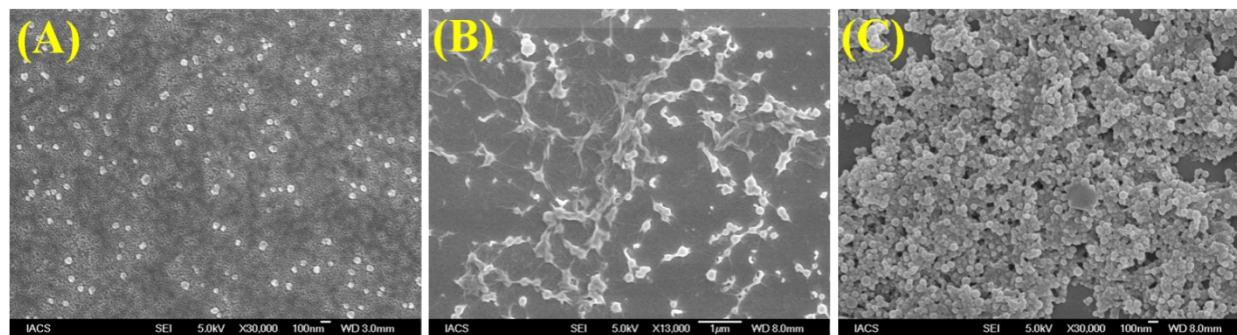

Fig. S2. SEM images of porphyrin in H<sub>2</sub>O (A), porphyrin-GO (B) and porphyrin-RGO (C) aging for 72 hr.

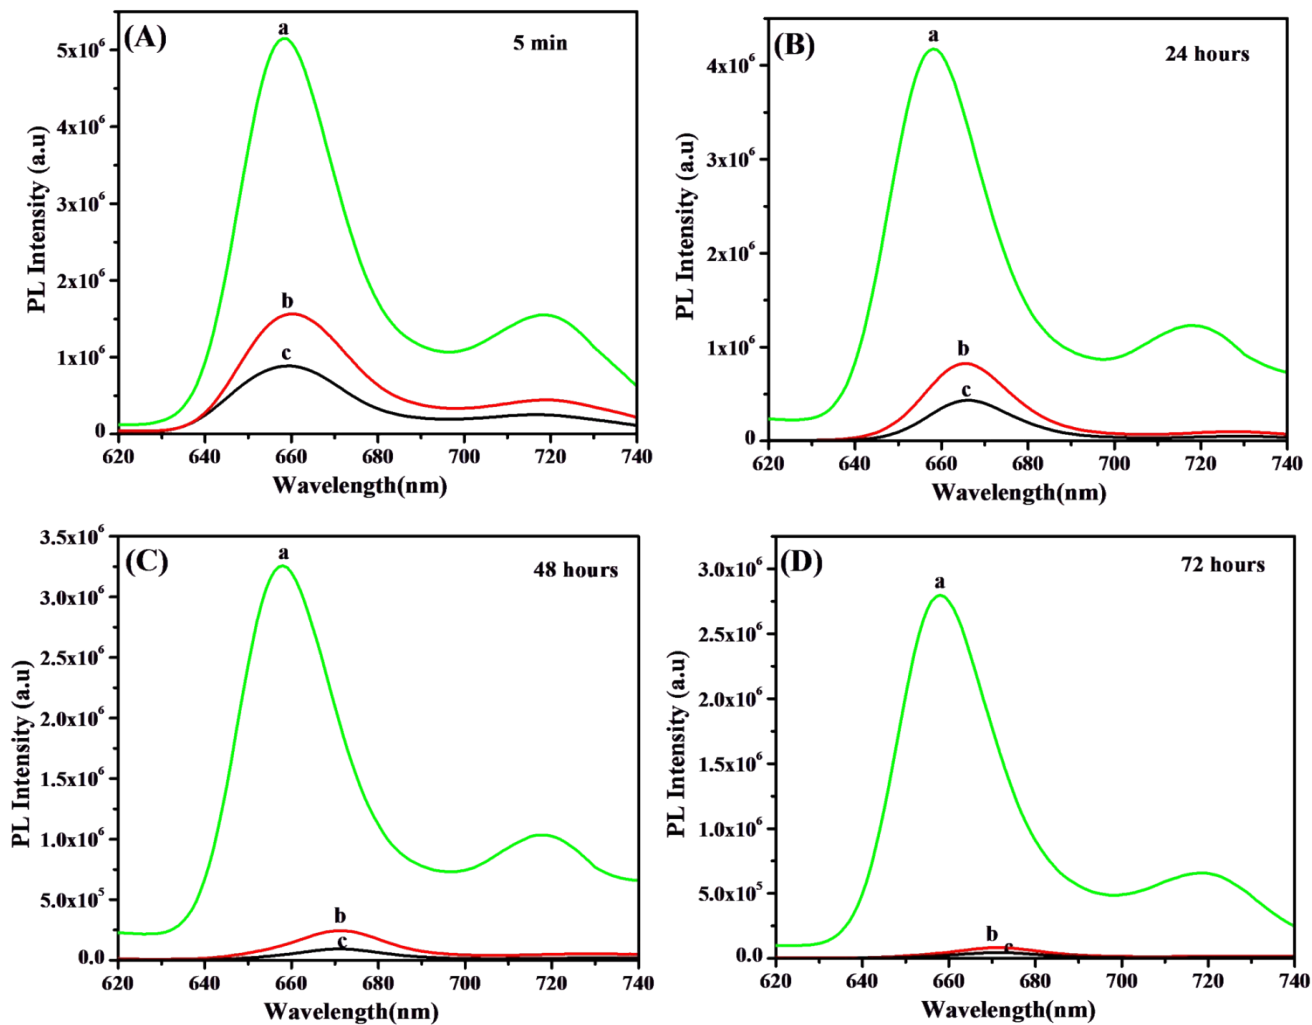

Fig. S3. Emission spectra of porphyrin in H<sub>2</sub>O (a), porphyrin/RGO (0.01mg mL<sup>-1</sup>) (b) and porphyrin/RGO (0.02mg mL<sup>-1</sup>) (c), with 5 min (A), 24 h (B), 48 h (C) and 72 h (D) aging.
